# Supplementary material for: Zn(II) Heteroleptic Halide Complexes with 2-Halopyridines: Features of Halogen Bonding in Solid State
Source: MDPI journal article supplement (doi:10.3390/molecules26113393), 2021-06-03
Supplement: s1 [file s1]

## Zn(II) heteroleptic halide complexes with 2-halopyridines: features of halogen bonding in solid state

Mikhail A. Vershinin, Marianna I. Rakhmanova, Alexander S. Novikov, Maxim N. Sokolov and Sergey A. Adonin\*

**Powder X-ray diffractometry.** XRD analysis of polycrystals was performed on Shimadzu XRD-7000 diffractometer (CuK-alpha radiation, Ni – filter, linear One Sight detector, 5 – 50° 2 $\theta$  range, 0.0143° 2 $\theta$  step, 2s per step). A polycrystalline sample was slightly ground with hexane in an agate mortar, and the resulting suspension was deposited on the polished side of a standard quartz sample holder, and a smooth thin layer being formed after drying. Plotting of PXRD patterns and data treatment was performed using X'Pert Plus software.

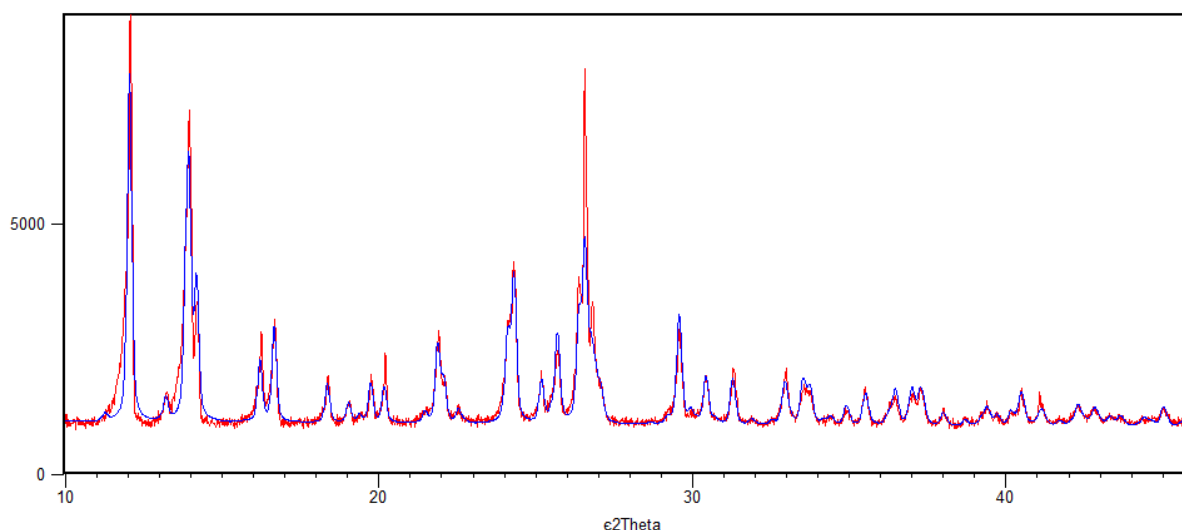

**Figure S1.** Experimental (blue) and calculated (red) PXRD patterns for **1**

## S-2

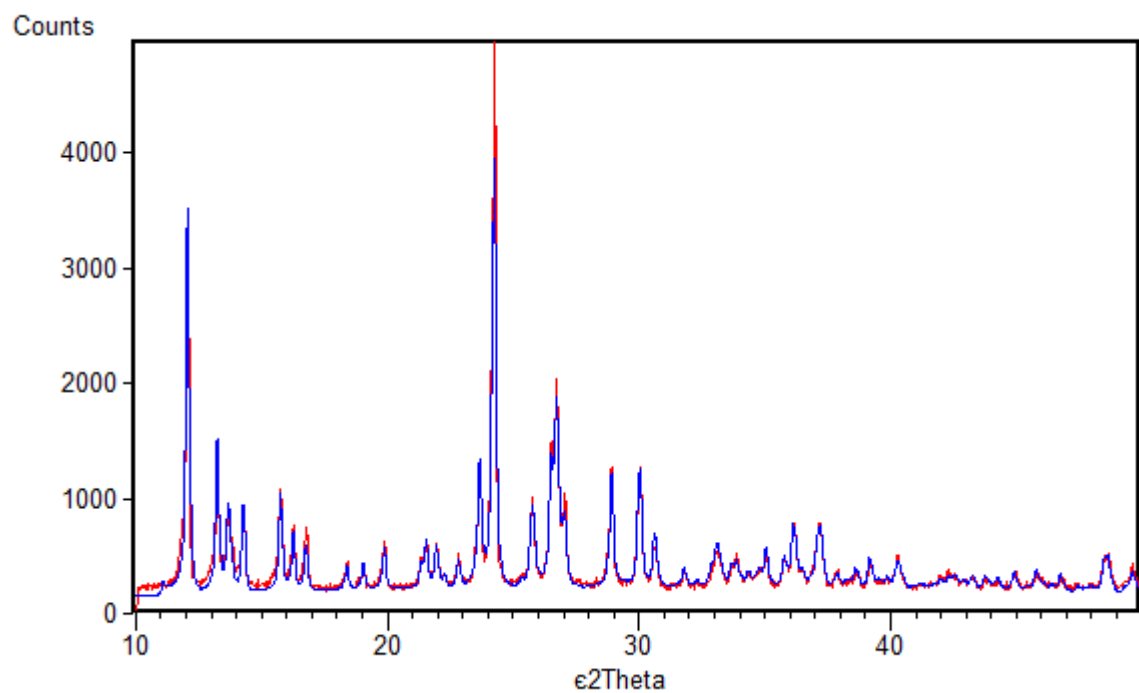

**Figure S2.** Experimental (blue) and calculated (red) PXRD patterns for **2**

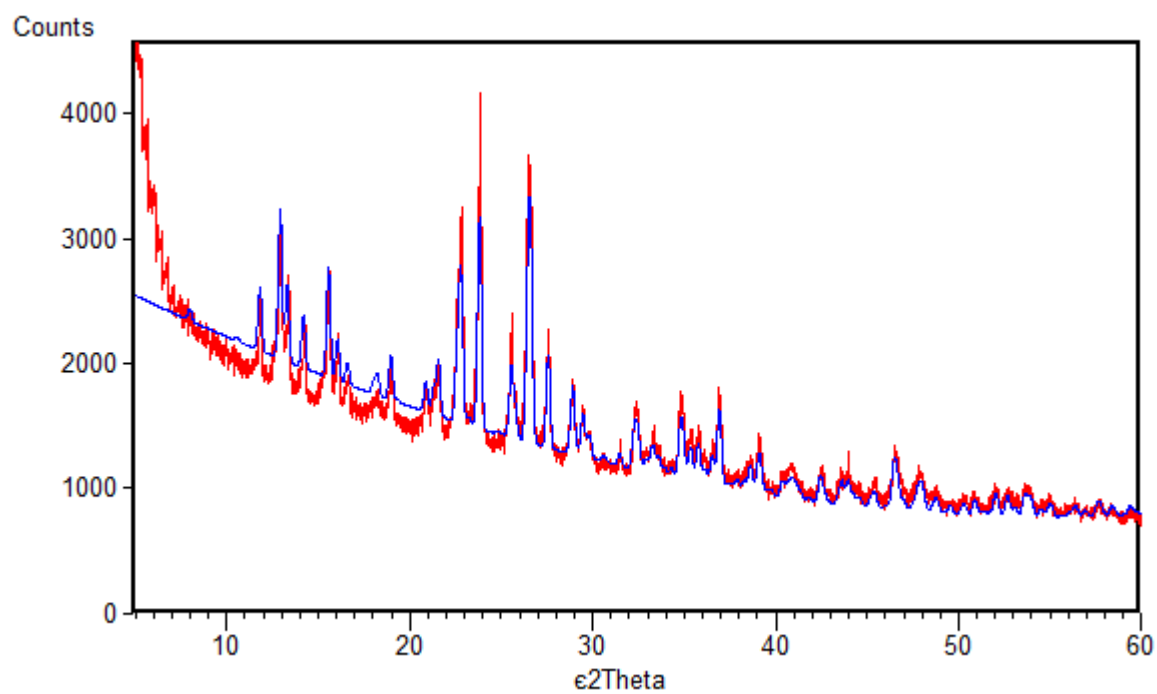

**Figure S3.** Experimental (blue) and calculated (red) PXRD patterns for **3**

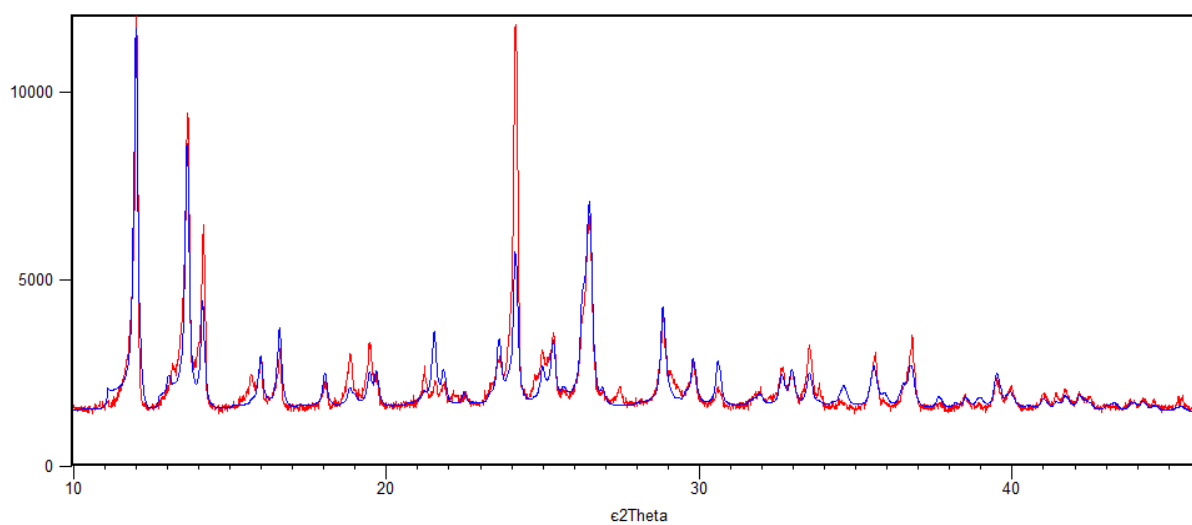

**Figure S4.** Experimental (blue) and calculated (red) PXRD patterns for **4**

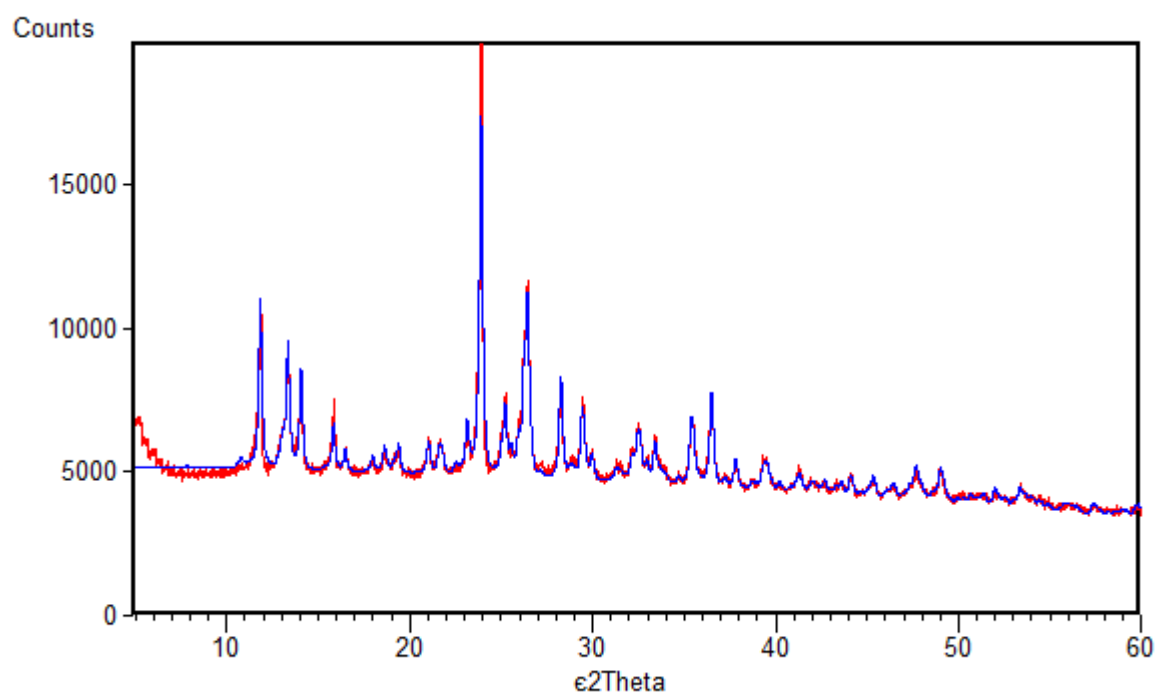

**Figure S5.** Experimental (blue) and calculated (red) PXRD patterns for **5**

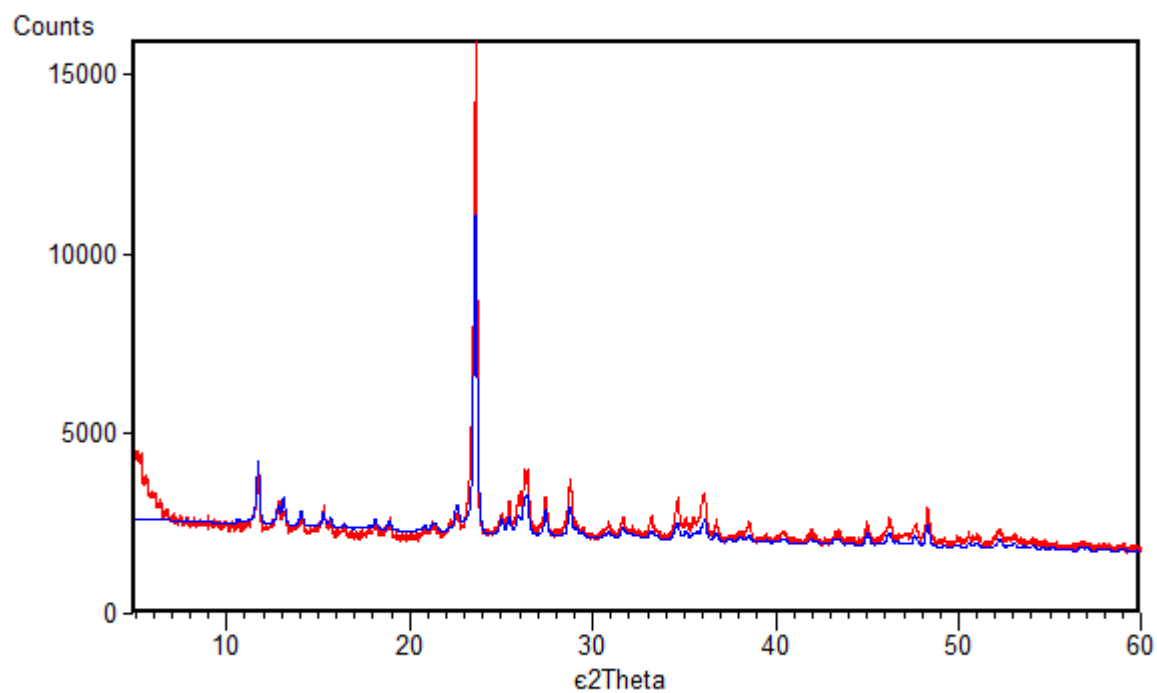

**Figure S6.** Experimental (blue) and calculated (red) PXRD patterns for **6**

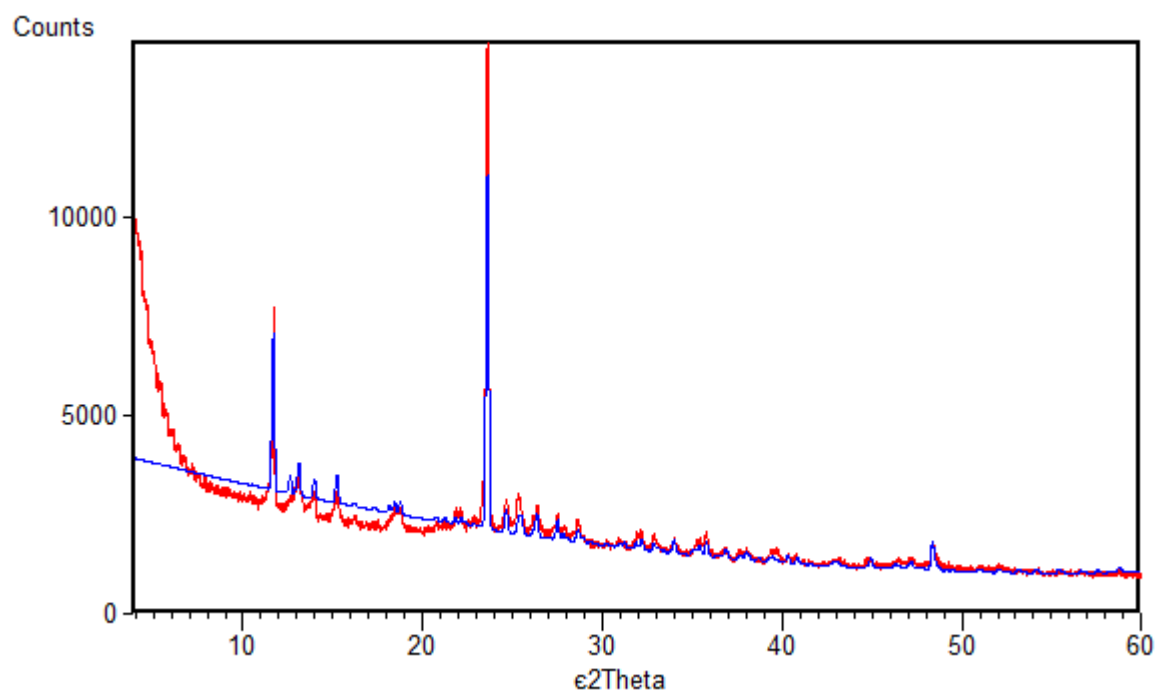

**Figure S7.** Experimental (blue) and calculated (red) PXRD patterns for **7**

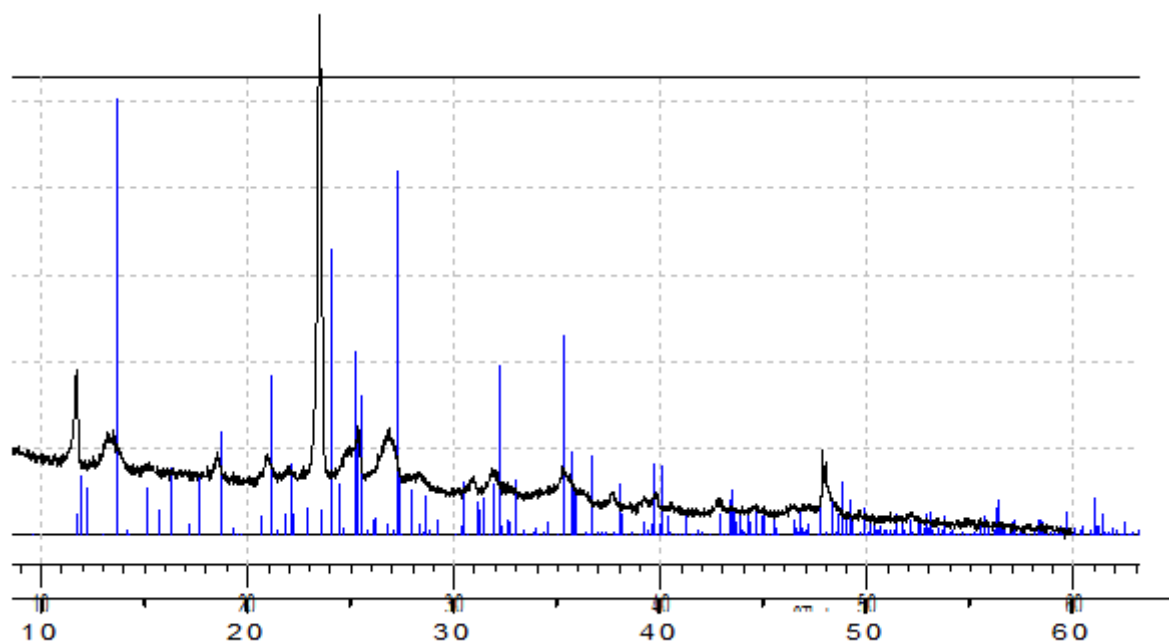

**Figure S8.** Experimental (black) and calculated (blue) PXRD patterns for **8** (calculation based on the structure of **9**)

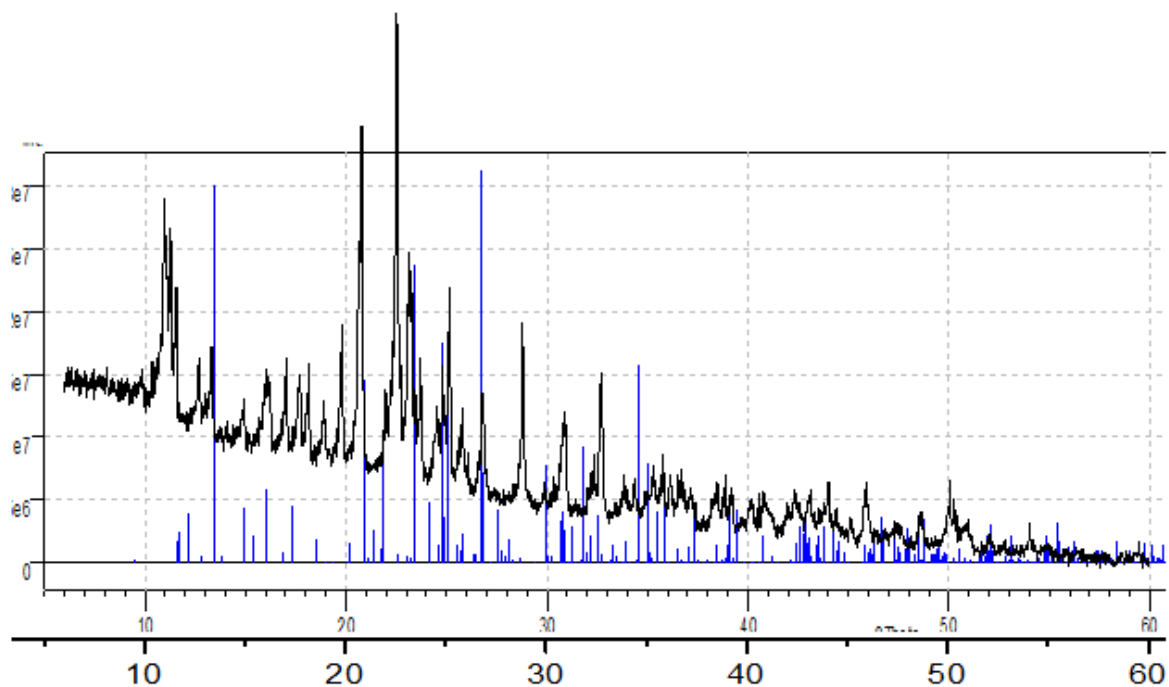

**Figure S9.** Experimental (black) and calculated (blue) PXRD patterns for **9**

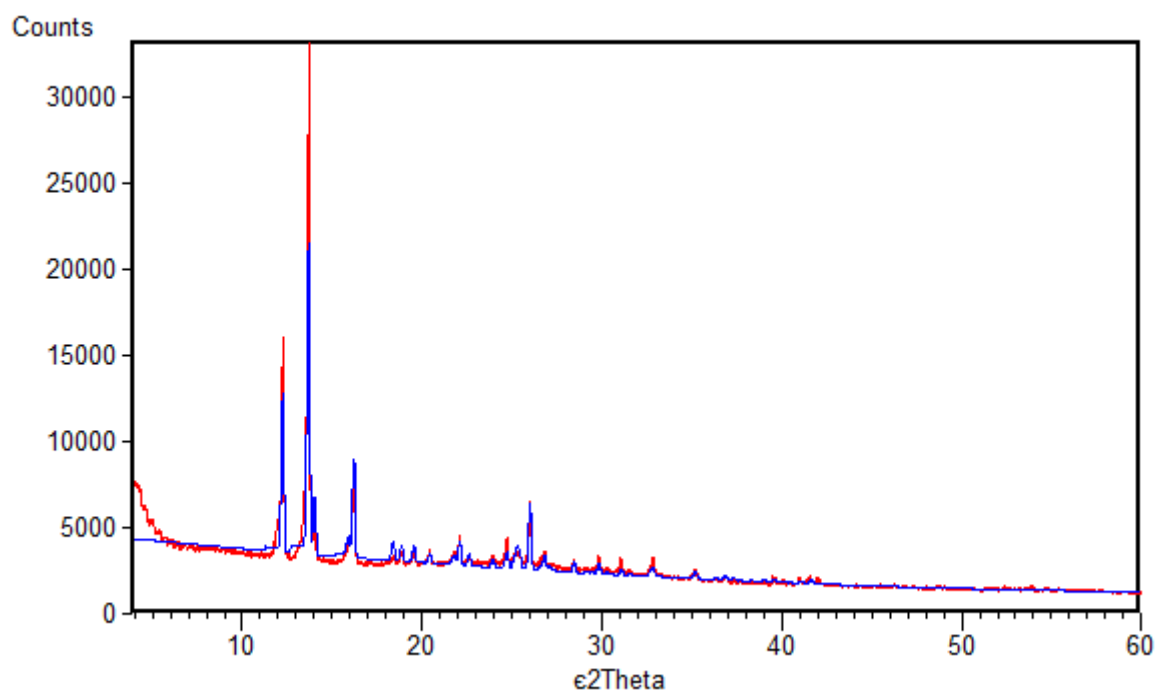

**Figure S10.** Experimental (blue) and calculated (red) PXRD patterns for **10**

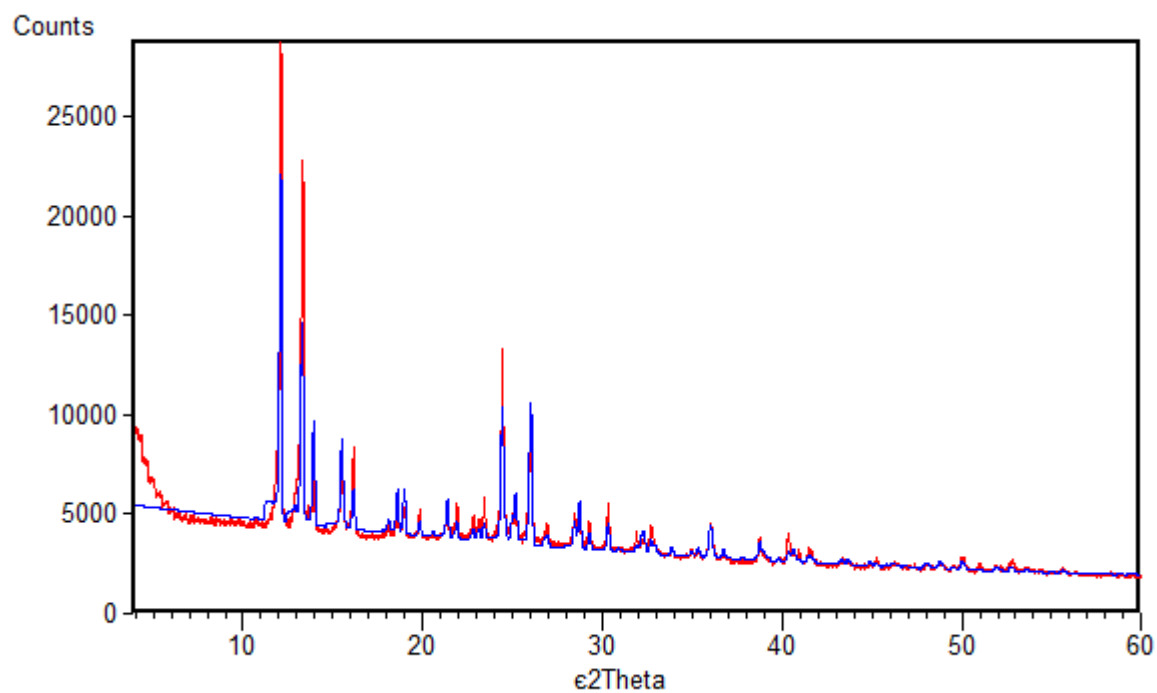

**Figure S11.** Experimental (blue) and calculated (red) PXRD patterns for **11**

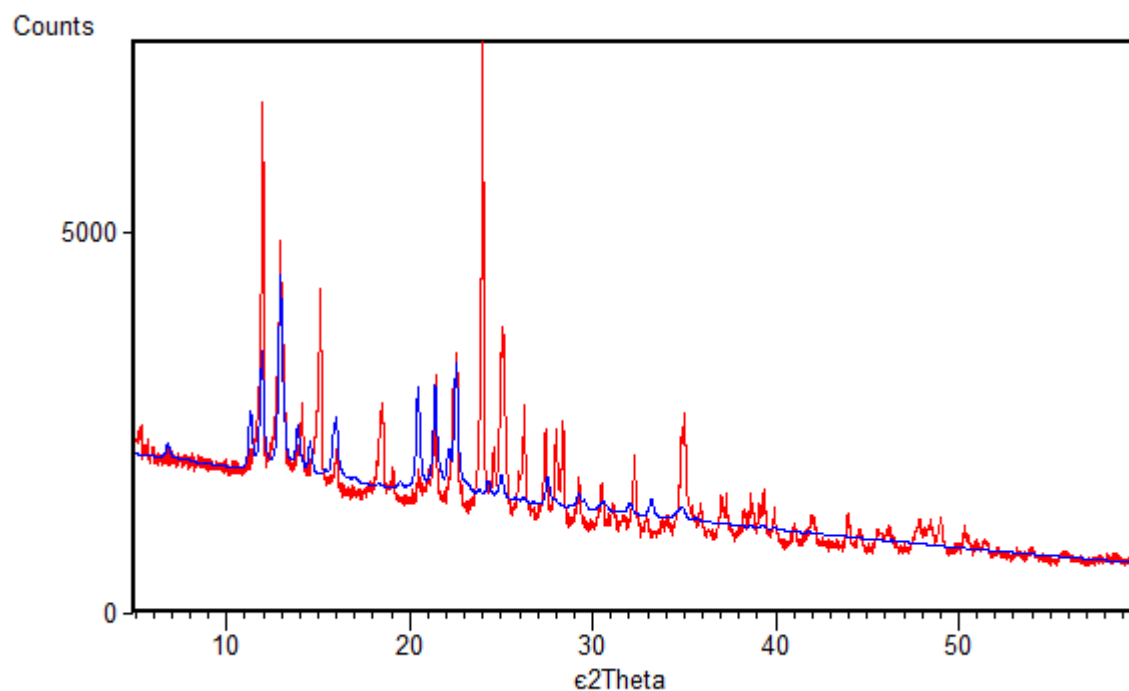

**Figure S12.** Experimental (blue) and calculated (red) PXRD patterns for **12**

**Table 1S.** Element analysis data for **1-9**

| Compound | C, H, N, calcd    | C, H, N, found    |
|----------|-------------------|-------------------|
| <b>1</b> | 33.35, 2.24, 7.78 | 33.72; 2.29; 7.84 |
| <b>2</b> | 26.80, 1.80, 6.25 | 27.02; 1.84; 6.33 |
| <b>3</b> | 22.07; 1.48; 5.15 | 22.16; 1.57; 5.23 |
| <b>4</b> | 26.80, 1.80, 6.25 | 27.04; 1.87; 6.37 |
| <b>5</b> | 22.40; 1.51; 5.23 | 22.71; 1.58; 5.31 |
| <b>6</b> | 19.00; 1.28; 4.43 | 18.81; 1.32; 4.57 |
| <b>7</b> | 22.07; 1.48; 5.15 | 21.79; 1.46; 5.03 |
| <b>8</b> | 19.00; 1.28; 4.43 | 18.87; 1.29; 4.37 |
| <b>9</b> | 16.49; 1.11; 3.85 | 16.57; 1.12; 3.87 |

**Table 2S.** Crystal data and structure refinement for **1-7** and **9**

|                                                   | <b>1</b>                                                         | <b>2</b>                                                                         | <b>3</b>                                                                        | <b>4</b>                                                                         | <b>5</b>                                                         | <b>6</b>                                                                        | <b>7</b>                                                                        | <b>9</b>                                                        |
|---------------------------------------------------|------------------------------------------------------------------|----------------------------------------------------------------------------------|---------------------------------------------------------------------------------|----------------------------------------------------------------------------------|------------------------------------------------------------------|---------------------------------------------------------------------------------|---------------------------------------------------------------------------------|-----------------------------------------------------------------|
| Empirical formula                                 | C <sub>10</sub> H <sub>8</sub> Cl <sub>4</sub> N <sub>2</sub> Zn | C <sub>10</sub> H <sub>8</sub> Br <sub>2</sub> Cl <sub>2</sub> N <sub>2</sub> Zn | C <sub>10</sub> H <sub>8</sub> Cl <sub>2</sub> I <sub>2</sub> N <sub>2</sub> Zn | C <sub>10</sub> H <sub>8</sub> Br <sub>2</sub> Cl <sub>2</sub> N <sub>2</sub> Zn | C <sub>10</sub> H <sub>8</sub> Br <sub>4</sub> N <sub>2</sub> Zn | C <sub>10</sub> H <sub>8</sub> Br <sub>2</sub> I <sub>2</sub> N <sub>2</sub> Zn | C <sub>10</sub> H <sub>8</sub> Cl <sub>2</sub> I <sub>2</sub> N <sub>2</sub> Zn | C <sub>10</sub> H <sub>8</sub> I <sub>4</sub> N <sub>2</sub> Zn |
| <i>M</i> , g/mol                                  | 363.35                                                           | 452.27                                                                           | 546.25                                                                          | 452.27                                                                           | 541.19                                                           | 635.18                                                                          | 546.25                                                                          | 729.15                                                          |
| Crystal system, space group                       | Triclinic, <i>P</i> -1                                           | Triclinic, <i>P</i> -1                                                           | Triclinic, <i>P</i> -1                                                          | Triclinic, <i>P</i> -1                                                           | Triclinic, <i>P</i> -1                                           | Triclinic, <i>P</i> -1                                                          | Triclinic, <i>P</i> -1                                                          | Monoclinic, <i>P</i> 2 <sub>1</sub> / <i>n</i>                  |
| <i>a</i> , <i>b</i> , <i>c</i> , Å                | 7.9423 (5),<br>8.3152 (5),<br>11.0341 (5)                        | 7.9146 (5),<br>8.4277 (6),<br>11.0498 (6)                                        | 7.9452 (4),<br>8.6864 (4),<br>11.1868 (5)                                       | 7.9347 (4), 8.4869 (8),<br>11.2381 (10)                                          | 7.9547 (4), 8.5643 (5),<br>11.2938 (4)                           | 8.0186 (5), 8.7153 (4),<br>11.4729 (7)                                          | 7.9153 (5), 8.7199 (5),<br>11.6868 (7)                                          | 8.8619 (4), 15.1663 (7),<br>11.8971 (6)                         |
| $\alpha$ , $\beta$ , $\gamma$ , °                 | 85.391 (4),<br>77.674 (4),<br>68.667 (5)                         | 85.571 (5),<br>78.054 (5),<br>69.729 (6)                                         | 86.820 (4),<br>78.182 (4),<br>71.658 (5)                                        | 85.754 (7), 77.454 (6),<br>69.687 (6)                                            | 85.769 (4), 78.058 (4),<br>70.447 (5)                            | 86.326 (4), 78.408 (5),<br>71.749 (5)                                           | 87.084 (4), 77.985 (5),<br>72.329 (5)                                           | 90, 92.969 (2), 90                                              |
| <i>V</i> , Å <sup>3</sup>                         | 663.13 (7)                                                       | 676.41 (8)                                                                       | 717.27 (6)                                                                      | 692.77 (10)                                                                      | 709.34 (6)                                                       | 745.91 (8)                                                                      | 751.67 (8)                                                                      | 1596.85 (13)                                                    |
| <i>Z</i>                                          | 2                                                                | 2                                                                                | 2                                                                               | 2                                                                                | 2                                                                | 2                                                                               | 2                                                                               | 4                                                               |
| <i>F</i> (000)                                    | 360                                                              | 432                                                                              | 504                                                                             | 432                                                                              | 504                                                              | 576                                                                             | 504                                                                             | 1296                                                            |
| <i>T</i> <sub>min</sub> , <i>T</i> <sub>max</sub> | 0.873, 1.000                                                     | 0.534,<br>1.000                                                                  | 0.623, 1.000                                                                    | 0.497, 1.000                                                                     | 0.602, 1.000                                                     | 0.585, 1.000                                                                    | 0.871, 1.000                                                                    | 0.454, 0.746                                                    |



|                                                                            |                                                                         |                                                                       |                                                                        |                                                                        |                                                                       |                                                                       |                                                                        |                                                                          |
|----------------------------------------------------------------------------|-------------------------------------------------------------------------|-----------------------------------------------------------------------|------------------------------------------------------------------------|------------------------------------------------------------------------|-----------------------------------------------------------------------|-----------------------------------------------------------------------|------------------------------------------------------------------------|--------------------------------------------------------------------------|
| No. of measured, independent and observed [ $I > 2\sigma(I)$ ] reflections | 4886, 2908, 2468                                                        | 4637, 2585, 2212                                                      | 5309, 2717, 2380                                                       | 4920, 2631, 2129                                                       | 5098, 2693, 2352                                                      | 5424, 2802, 2352                                                      | 5427, 2854, 2376                                                       | 27006, 2952, 2890                                                        |
| $R_{\text{int}}$                                                           | 0.026                                                                   | 0.029                                                                 | 0.026                                                                  | 0.026                                                                  | 0.026                                                                 | 0.034                                                                 | 0.032                                                                  | 0.037                                                                    |
| $\theta$ values ( $^\circ$ )                                               | $\theta_{\text{max}} = 28.9, \theta_{\text{min}} = 1.9$                 | $\theta_{\text{max}} = 25.7, \theta_{\text{min}} = 1.9$               | $\theta_{\text{max}} = 25.7, \theta_{\text{min}} = 2.5$                | $\theta_{\text{max}} = 25.7, \theta_{\text{min}} = 1.9$                | $\theta_{\text{max}} = 25.7, \theta_{\text{min}} = 1.8$               | $\theta_{\text{max}} = 25.7, \theta_{\text{min}} = 2.5$               | $\theta_{\text{max}} = 25.7, \theta_{\text{min}} = 2.5$                | $\theta_{\text{max}} = 25.7, \theta_{\text{min}} = 2.2$                  |
| Range of $h, k, l$                                                         | $h = -10 \rightarrow 10, k = -10 \rightarrow 8, l = -14 \rightarrow 12$ | $h = -7 \rightarrow 9, k = -10 \rightarrow 9, l = -13 \rightarrow 13$ | $h = -9 \rightarrow 9, k = -10 \rightarrow 10, l = -13 \rightarrow 10$ | $h = -9 \rightarrow 9, k = -10 \rightarrow 10, l = -11 \rightarrow 13$ | $h = -8 \rightarrow 9, k = -10 \rightarrow 8, l = -13 \rightarrow 13$ | $h = -9 \rightarrow 9, k = -8 \rightarrow 10, l = -13 \rightarrow 13$ | $h = -9 \rightarrow 9, k = -10 \rightarrow 10, l = -14 \rightarrow 14$ | $h = -10 \rightarrow 10, k = -18 \rightarrow 18, l = -14 \rightarrow 14$ |
| $R[F^2 > 2\sigma(F^2)], wR(F^2), S$                                        | 0.035, 0.081, 1.05                                                      | 0.034, 0.078, 1.01                                                    | 0.030, 0.064, 1.06                                                     | 0.035, 0.078, 1.07                                                     | 0.026, 0.052, 1.01                                                    | 0.054, 0.139, 1.09                                                    | 0.033, 0.067, 1.01                                                     | 0.040, 0.110, 1.10                                                       |
| No. of reflections                                                         | 2908                                                                    | 2585                                                                  | 2717                                                                   | 2631                                                                   | 2693                                                                  | 2802                                                                  | 2854                                                                   | 2952                                                                     |
| No. of parameters                                                          | 154                                                                     | 154                                                                   | 154                                                                    | 154                                                                    | 154                                                                   | 154                                                                   | 154                                                                    | 154                                                                      |
| $\Delta\rho_{\text{max}}, \Delta\rho_{\text{min}}$ (e $\text{\AA}^{-3}$ )  | 0.64, -0.57                                                             | 0.87, -0.65                                                           | 0.98, -0.99                                                            | 0.77, -0.66                                                            | 0.64, -0.67                                                           | 1.93, -1.67                                                           | 1.51, -0.91                                                            | 3.49, -0.80                                                              |

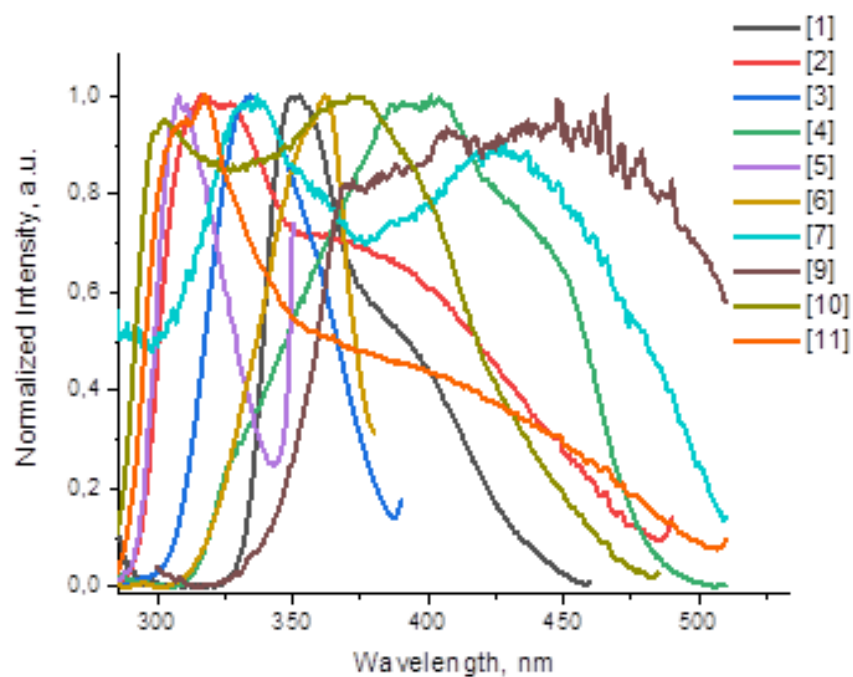

**Fig. S13.** Normalized excitation spectra of complexes in solid state at 298 K.

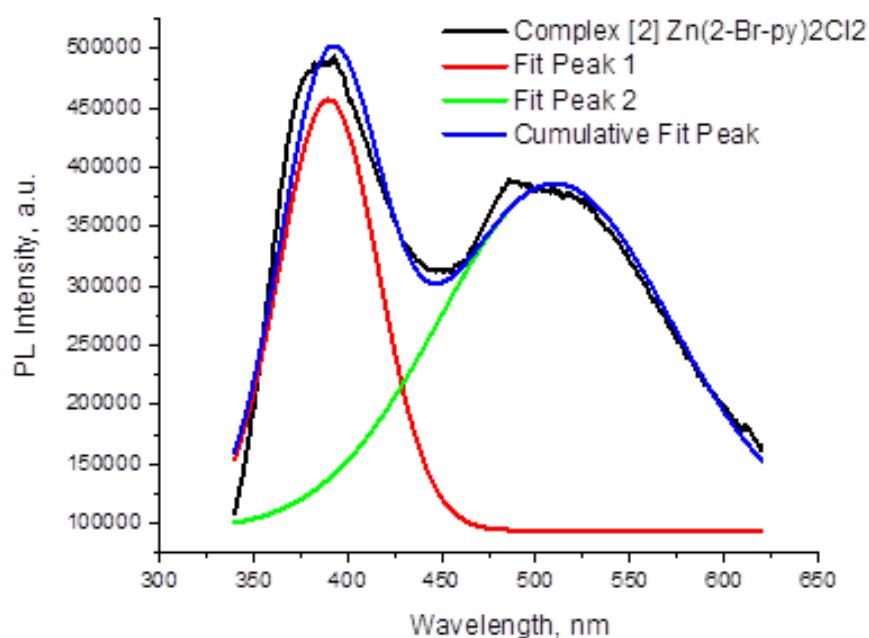

**Fig. S14.** Emission spectra of **2** and its decomposition on two and three Gauss components,  $T = 298$  K,  $\lambda_{\text{exc}} = 350$  nm. Gauss fit was performed in eV scale and then spectra were reported in nm scale. Conversion between eV and nm scales was performed with account of  $\lambda_2$  factor

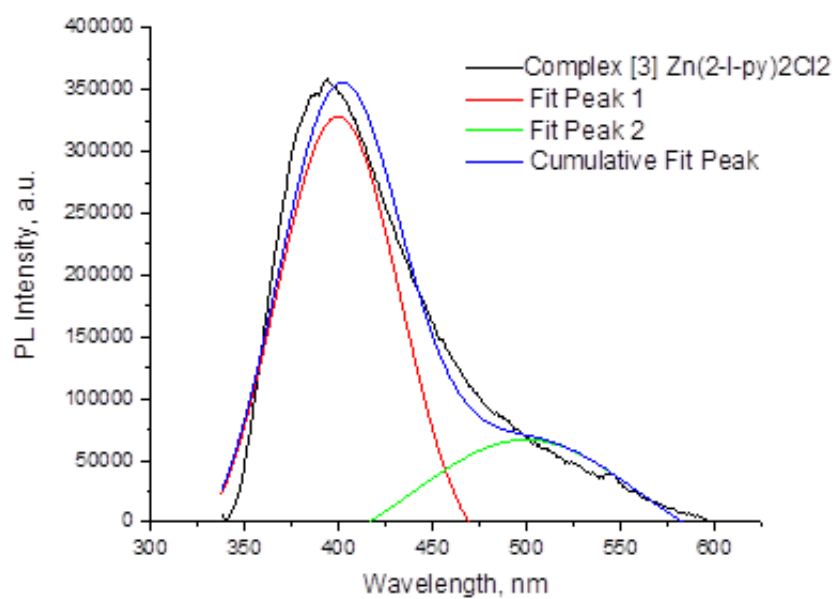

**Fig. S15.** Description see S14, for 3

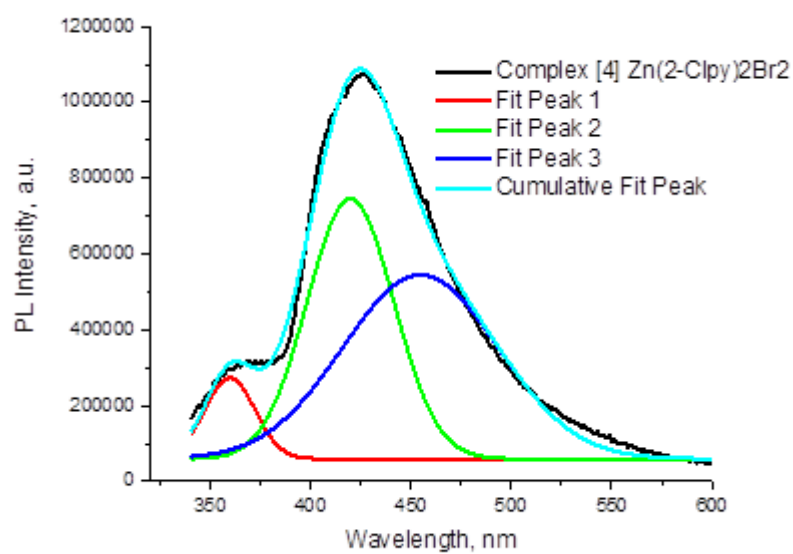

**Fig. S16.** Description see S14, for 4

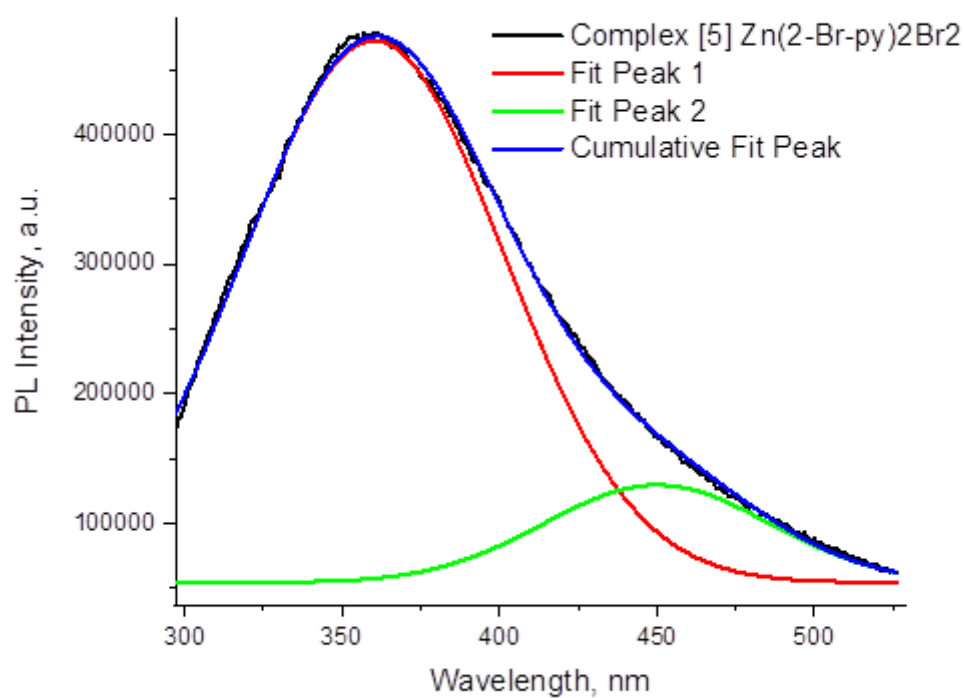

**Fig. S17.** Description see S14, for 5

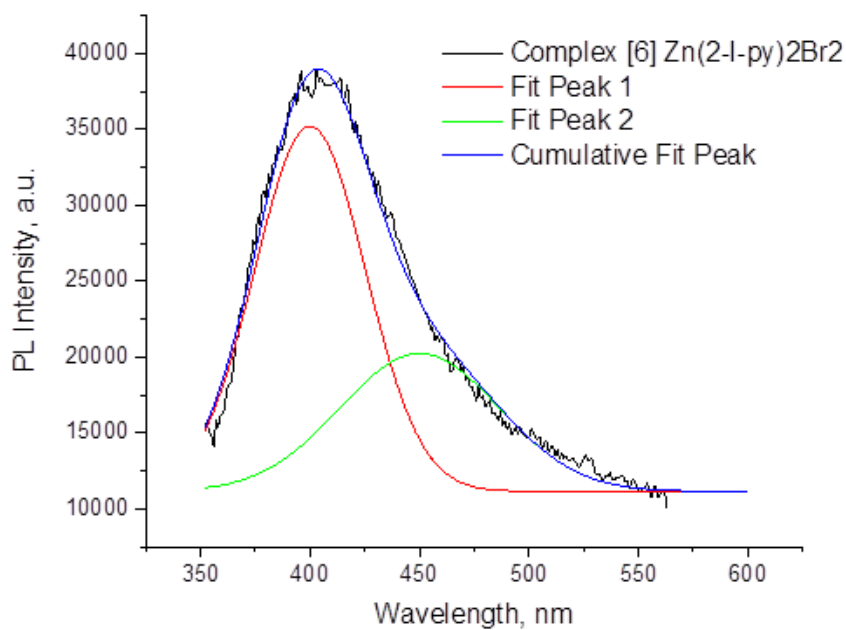

**Fig. S18.** Description see S14, for 6

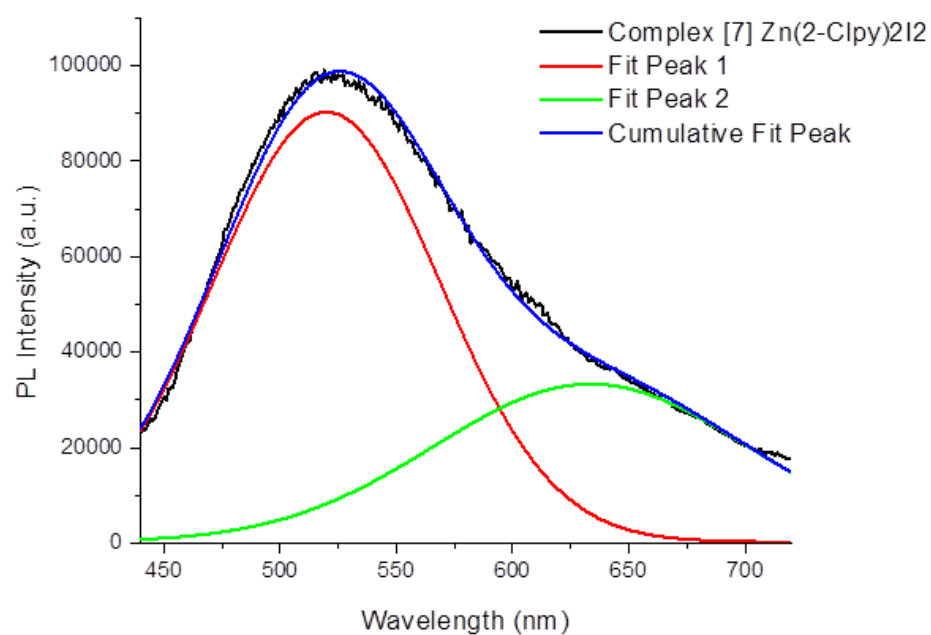

**Fig. S19.** Description see S14, for **7**

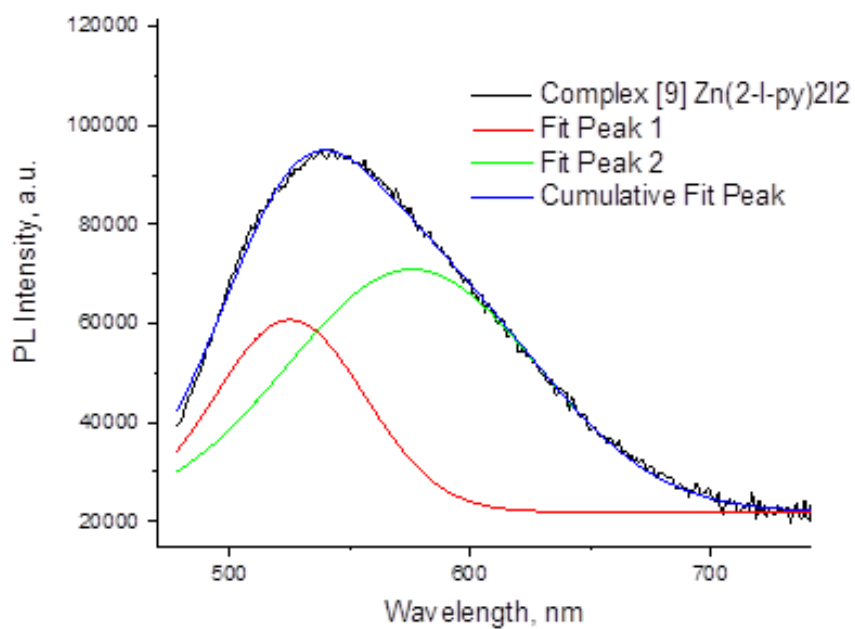

**Fig. S20.** Description see S14, for **9**

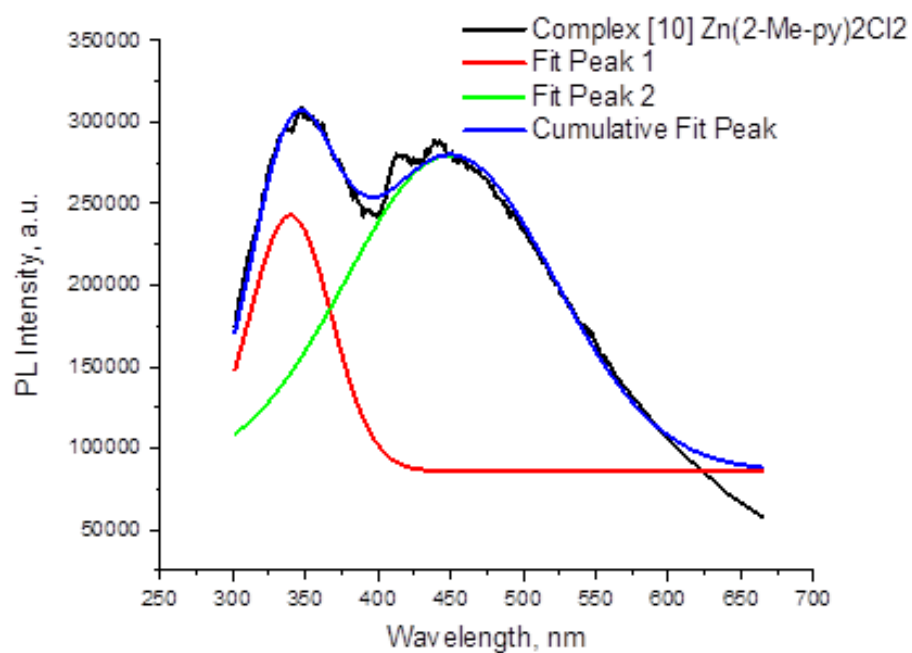

**Fig. S21.** Description see S14, for **10**

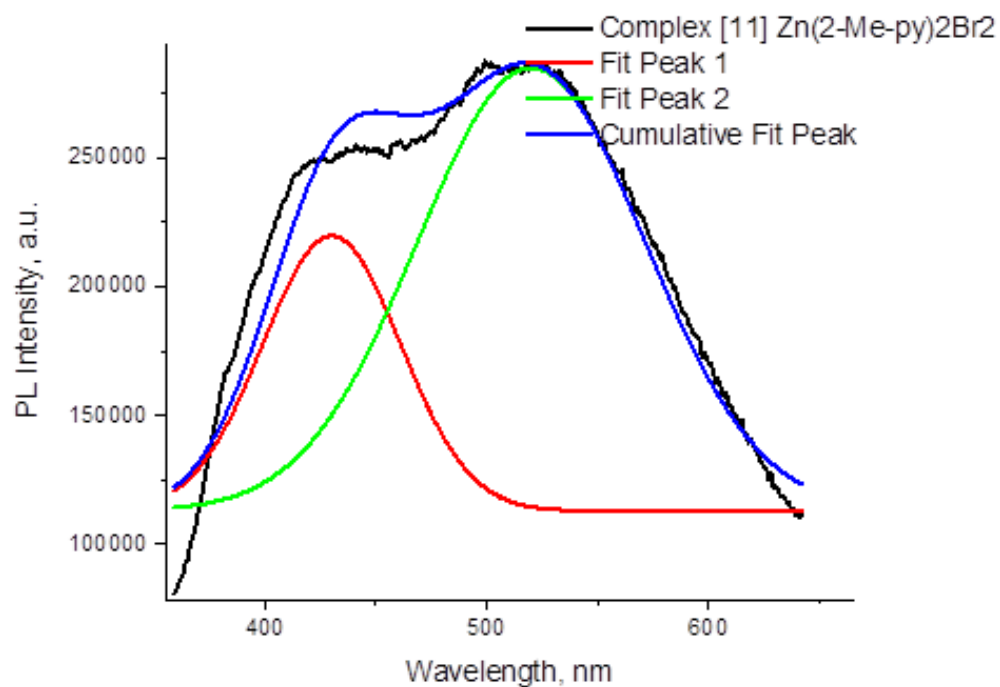

**Fig. S22.** Description see S14, for **11**

**Table 3S.** Cartesian atomic coordinates for model supramolecular trimeric associates.

| Atom     | X        | Y        | Z         |
|----------|----------|----------|-----------|
| <b>1</b> |          |          |           |
| C        | 4.440975 | 4.226013 | 3.951839  |
| C        | 4.121055 | 5.106585 | 4.968365  |
| H        | 3.701437 | 5.940238 | 4.788344  |
| C        | 4.437899 | 4.720047 | 6.261930  |
| H        | 4.258331 | 5.300021 | 6.991716  |
| C        | 5.016528 | 3.488396 | 6.481836  |
| H        | 5.225201 | 3.205979 | 7.364693  |
| C        | 5.287634 | 2.670387 | 5.406021  |
| H        | 5.672115 | 1.816538 | 5.566639  |
| C        | 3.884008 | 1.773042 | 0.297520  |
| H        | 4.619745 | 2.239740 | -0.083004 |
| C        | 2.763193 | 1.557765 | -0.471073 |
| H        | 2.728628 | 1.861821 | -1.370100 |
| C        | 1.689221 | 0.893307 | 0.086238  |
| H        | 0.908952 | 0.728348 | -0.430110 |
| C        | 1.755268 | 0.471191 | 1.397050  |
| H        | 1.021838 | 0.032475 | 1.810990  |
| C        | 2.917872 | 0.708678 | 2.080483  |
| N        | 5.028145 | 3.036863 | 4.138328  |
| N        | 3.971700 | 1.340003 | 1.581382  |
| Cl       | 6.676803 | 0.025179 | 3.583389  |
| Cl       | 7.048009 | 2.842922 | 1.212285  |
| Cl       | 4.066612 | 4.653443 | 2.316882  |

|    |           |          |           |
|----|-----------|----------|-----------|
| Cl | 3.057617  | 0.191137 | 3.731179  |
| Zn | 5.695180  | 1.787289 | 2.622271  |
| C  | 6.526293  | 3.519445 | -3.951839 |
| C  | 6.846213  | 2.638873 | -4.968365 |
| H  | 7.265831  | 1.805220 | -4.788344 |
| C  | 6.529369  | 3.025411 | -6.261930 |
| H  | 6.708937  | 2.445437 | -6.991716 |
| C  | 5.950740  | 4.257062 | -6.481836 |
| H  | 5.742068  | 4.539478 | -7.364693 |
| C  | 5.679634  | 5.075071 | -5.406021 |
| H  | 5.295154  | 5.928919 | -5.566639 |
| C  | 7.083260  | 5.972416 | -0.297520 |
| H  | 6.347523  | 5.505717 | 0.083004  |
| C  | 8.204075  | 6.187693 | 0.471073  |
| H  | 8.238640  | 5.883637 | 1.370100  |
| C  | 9.278047  | 6.852151 | -0.086238 |
| H  | 10.058316 | 7.017110 | 0.430110  |
| C  | 9.212000  | 7.274267 | -1.397050 |
| H  | 9.945430  | 7.712983 | -1.810990 |
| C  | 8.049396  | 7.036780 | -2.080483 |
| N  | 5.939123  | 4.708595 | -4.138328 |
| N  | 6.995568  | 6.405455 | -1.581382 |
| Cl | 4.290466  | 7.720279 | -3.583389 |
| Cl | 3.919260  | 4.902536 | -1.212285 |
| Cl | 6.900656  | 3.092015 | -2.316882 |
| Cl | 7.909651  | 7.554320 | -3.731179 |



|    |          |           |           |
|----|----------|-----------|-----------|
| Zn | 5.272088 | 5.958169  | -2.622271 |
| C  | 5.856815 | -4.194073 | 6.827864  |
| C  | 6.176736 | -5.074645 | 5.811338  |
| H  | 6.596354 | -5.908297 | 5.991359  |
| C  | 5.859891 | -4.688107 | 4.517774  |
| H  | 6.039459 | -5.268080 | 3.787988  |
| C  | 5.281263 | -3.456456 | 4.297868  |
| H  | 5.072590 | -3.174039 | 3.415010  |
| C  | 5.010156 | -2.638446 | 5.373682  |
| H  | 4.625676 | -1.784598 | 5.213065  |
| C  | 6.413783 | -1.741102 | 10.482184 |
| H  | 5.678045 | -2.207800 | 10.862707 |
| C  | 7.534598 | -1.525824 | 11.250777 |
| H  | 7.569163 | -1.829881 | 12.149804 |
| C  | 8.608569 | -0.861366 | 10.693466 |
| H  | 9.388839 | -0.696407 | 11.209814 |
| C  | 8.542522 | -0.439250 | 9.382654  |
| H  | 9.275952 | -0.000535 | 8.968713  |
| C  | 7.379918 | -0.676737 | 8.699221  |
| N  | 5.269645 | -3.004923 | 6.641375  |
| N  | 6.326090 | -1.308062 | 9.198321  |
| Cl | 3.620988 | 0.006761  | 7.196314  |
| Cl | 3.249782 | -2.810982 | 9.567418  |
| Cl | 6.231178 | -4.621502 | 8.462822  |
| Cl | 7.240173 | -0.159197 | 7.048525  |
| Zn | 4.602611 | -1.755348 | 8.157433  |

| 2  |           |          |           |
|----|-----------|----------|-----------|
| C  | 9.227428  | 6.198175 | 10.548692 |
| H  | 8.476952  | 5.754557 | 10.925971 |
| C  | 10.327963 | 6.409213 | 11.331357 |
| H  | 10.331078 | 6.130059 | 12.239423 |
| C  | 11.437225 | 7.032075 | 10.786518 |
| H  | 12.214512 | 7.183864 | 11.312980 |
| C  | 11.394059 | 7.428911 | 9.464418  |
| H  | 12.143282 | 7.840685 | 9.050384  |
| C  | 10.233399 | 7.208108 | 8.767154  |
| C  | 7.900934  | 5.224971 | 5.411637  |
| H  | 7.497124  | 6.070746 | 5.257049  |
| C  | 8.181496  | 4.428744 | 4.338174  |
| H  | 7.960806  | 4.713601 | 3.458215  |
| C  | 8.791566  | 3.206171 | 4.543569  |
| H  | 8.986473  | 2.634923 | 3.809550  |
| C  | 9.112993  | 2.826513 | 5.829995  |
| H  | 9.553631  | 2.002991 | 6.004041  |
| C  | 8.770810  | 3.688882 | 6.859136  |
| Cl | 6.463964  | 7.864815 | 7.222903  |
| Cl | 6.096383  | 5.053692 | 9.565927  |
| Zn | 7.472102  | 6.117100 | 8.184803  |
| Br | 10.142643 | 7.756378 | 6.951348  |
| Br | 9.199706  | 3.207261 | 8.636133  |
| N  | 9.163091  | 6.596760 | 9.254699  |
| N  | 8.170308  | 4.864183 | 6.680766  |

|    |          |          |           |
|----|----------|----------|-----------|
| C  | 6.181431 | 1.837355 | 11.071910 |
| H  | 6.931906 | 2.280973 | 10.694631 |
| C  | 5.080895 | 1.626317 | 10.289244 |
| H  | 5.077781 | 1.905471 | 9.381179  |
| C  | 3.971634 | 1.003455 | 10.834084 |
| H  | 3.194347 | 0.851666 | 10.307622 |
| C  | 4.014800 | 0.606619 | 12.156183 |
| H  | 3.265577 | 0.194845 | 12.570218 |
| C  | 5.175460 | 0.827422 | 12.853448 |
| C  | 7.507924 | 2.810559 | 16.208965 |
| H  | 7.911734 | 1.964784 | 16.363553 |
| C  | 7.227363 | 3.606786 | 17.282428 |
| H  | 7.448053 | 3.321929 | 18.162387 |
| C  | 6.617293 | 4.829359 | 17.077032 |
| H  | 6.422386 | 5.400607 | 17.811052 |
| C  | 6.295865 | 5.209017 | 15.790607 |
| H  | 5.855227 | 6.032539 | 15.616561 |
| C  | 6.638049 | 4.346648 | 14.761466 |
| Cl | 8.944894 | 0.170715 | 14.397699 |
| Cl | 9.312476 | 2.981838 | 12.054675 |
| Zn | 7.936757 | 1.918430 | 13.435799 |
| Br | 5.266215 | 0.279152 | 14.669254 |
| Br | 6.209153 | 4.828269 | 12.984469 |
| N  | 6.245767 | 1.438770 | 12.365903 |
| N  | 7.238551 | 3.171347 | 14.939836 |
| C  | 6.814104 | 9.678179 | 0.261609  |

|          |           |           |           |
|----------|-----------|-----------|-----------|
| H        | 7.564580  | 10.121796 | -0.115670 |
| C        | 5.713569  | 9.467140  | -0.521057 |
| H        | 5.710454  | 9.746295  | -1.429122 |
| C        | 4.604307  | 8.844278  | 0.023783  |
| H        | 3.827020  | 8.692489  | -0.502679 |
| C        | 4.647473  | 8.447442  | 1.345882  |
| H        | 3.898250  | 8.035668  | 1.759917  |
| C        | 5.808133  | 8.668245  | 2.043147  |
| C        | 8.140598  | 10.651383 | 5.398664  |
| H        | 8.544408  | 9.805608  | 5.553252  |
| C        | 7.860036  | 11.447609 | 6.472127  |
| H        | 8.080726  | 11.162752 | 7.352086  |
| C        | 7.249966  | 12.670183 | 6.266731  |
| H        | 7.055059  | 13.241430 | 7.000751  |
| C        | 6.928539  | 13.049840 | 4.980306  |
| H        | 6.487901  | 13.873362 | 4.806260  |
| C        | 7.270722  | 12.187471 | 3.951165  |
| Cl       | 9.577568  | 8.011538  | 3.587398  |
| Cl       | 9.945149  | 10.822661 | 1.244374  |
| Zn       | 8.569430  | 9.759253  | 2.625498  |
| Br       | 5.898889  | 8.119975  | 3.858953  |
| Br       | 6.841826  | 12.669092 | 2.174168  |
| N        | 6.878441  | 9.279593  | 1.555602  |
| N        | 7.871224  | 11.012170 | 4.129535  |
| <b>3</b> |           |           |           |
| C        | 10.104779 | 7.352647  | 8.908239  |

|    |           |          |           |
|----|-----------|----------|-----------|
| C  | 11.251424 | 7.545026 | 9.648403  |
| H  | 12.016716 | 7.952791 | 9.259707  |
| C  | 11.264938 | 7.136673 | 10.951353 |
| H  | 12.042353 | 7.259331 | 11.483483 |
| C  | 10.123648 | 6.536934 | 11.496622 |
| H  | 10.099983 | 6.261837 | 12.405402 |
| C  | 9.042374  | 6.360199 | 10.673244 |
| H  | 8.271346  | 5.934613 | 11.029092 |
| C  | 7.753991  | 5.378566 | 5.516189  |
| H  | 7.314376  | 6.211723 | 5.389178  |
| C  | 8.052587  | 4.626496 | 4.419082  |
| H  | 7.817556  | 4.931708 | 3.550814  |
| C  | 8.698546  | 3.416211 | 4.580035  |
| H  | 8.908065  | 2.873521 | 3.828922  |
| C  | 9.031856  | 3.016431 | 5.849043  |
| H  | 9.489946  | 2.196329 | 5.990287  |
| C  | 8.690733  | 3.824822 | 6.919871  |
| N  | 9.013418  | 6.757686 | 9.385623  |
| N  | 8.055015  | 4.994568 | 6.773152  |
| Cl | 6.280574  | 7.980436 | 7.379846  |
| Cl | 5.940787  | 5.123114 | 9.639862  |
| Zn | 7.340615  | 6.231935 | 8.297933  |
| I  | 10.059554 | 7.990830 | 6.910017  |
| I  | 9.217908  | 3.236079 | 8.861486  |
| C  | 5.156123  | 0.680859 | 12.990087 |
| C  | 4.009478  | 0.488480 | 12.249924 |

|    |          |          |           |
|----|----------|----------|-----------|
| H  | 3.244185 | 0.080715 | 12.638619 |
| C  | 3.995963 | 0.896833 | 10.946974 |
| H  | 3.218549 | 0.774176 | 10.414844 |
| C  | 5.137254 | 1.496572 | 10.401705 |
| H  | 5.160919 | 1.771669 | 9.492925  |
| C  | 6.218527 | 1.673307 | 11.225082 |
| H  | 6.989556 | 2.098893 | 10.869235 |
| C  | 7.506911 | 2.654940 | 16.382138 |
| H  | 7.946525 | 1.821783 | 16.509149 |
| C  | 7.208315 | 3.407010 | 17.479244 |
| H  | 7.443346 | 3.101798 | 18.347513 |
| C  | 6.562355 | 4.617295 | 17.318292 |
| H  | 6.352836 | 5.159985 | 18.069404 |
| C  | 6.229046 | 5.017075 | 16.049284 |
| H  | 5.770956 | 5.837177 | 15.908040 |
| C  | 6.570169 | 4.208684 | 14.978456 |
| N  | 6.247484 | 1.275820 | 12.512704 |
| N  | 7.205887 | 3.038938 | 15.125174 |
| Cl | 8.980328 | 0.053070 | 14.518481 |
| Cl | 9.320115 | 2.910392 | 12.258464 |
| Zn | 7.920287 | 1.801571 | 13.600394 |
| I  | 5.201347 | 0.042676 | 14.988310 |
| I  | 6.042993 | 4.797427 | 13.036840 |
| C  | 5.598535 | 9.031738 | 2.040924  |
| C  | 4.451890 | 8.839358 | 1.300761  |
| H  | 3.686598 | 8.431594 | 1.689456  |

|    |          |           |           |
|----|----------|-----------|-----------|
| C  | 4.438376 | 9.247712  | -0.002190 |
| H  | 3.660961 | 9.125054  | -0.534319 |
| C  | 5.579666 | 9.847451  | -0.547458 |
| H  | 5.603331 | 10.122548 | -1.456239 |
| C  | 6.660940 | 10.024185 | 0.275919  |
| H  | 7.431968 | 10.449772 | -0.079929 |
| C  | 7.949323 | 11.005818 | 5.432975  |
| H  | 8.388938 | 10.172662 | 5.559985  |
| C  | 7.650728 | 11.757889 | 6.530081  |
| H  | 7.885758 | 11.452676 | 7.398350  |
| C  | 7.004768 | 12.968174 | 6.369128  |
| H  | 6.795249 | 13.510864 | 7.120241  |
| C  | 6.671458 | 13.367954 | 5.100120  |
| H  | 6.213368 | 14.188056 | 4.958876  |
| C  | 7.012581 | 12.559563 | 4.029292  |
| N  | 6.689896 | 9.626699  | 1.563541  |
| N  | 7.648299 | 11.389817 | 4.176011  |
| Cl | 9.422740 | 8.403948  | 3.569318  |
| Cl | 9.762527 | 11.261270 | 1.309301  |
| Zn | 8.362699 | 10.152450 | 2.651230  |
| I  | 5.643760 | 8.393555  | 4.039146  |
| I  | 6.485406 | 13.148306 | 2.087677  |
| 4  |          |           |           |
| C  | 3.857053 | 1.811724  | 0.376262  |
| H  | 4.557030 | 2.345521  | 0.017552  |
| C  | 2.788490 | 1.483434  | -0.436596 |

|    |          |           |           |
|----|----------|-----------|-----------|
| H  | 2.758057 | 1.774498  | -1.340503 |
| C  | 1.768433 | 0.724140  | 0.092146  |
| H  | 1.024207 | 0.482990  | -0.446469 |
| C  | 1.832970 | 0.317855  | 1.404127  |
| H  | 1.136759 | -0.200861 | 1.790262  |
| C  | 2.936379 | 0.683668  | 2.140197  |
| C  | 4.445069 | 4.293449  | 4.047835  |
| C  | 4.139586 | 5.154671  | 5.080088  |
| H  | 3.734014 | 5.996207  | 4.906766  |
| C  | 4.437029 | 4.767527  | 6.365742  |
| H  | 4.250336 | 5.343465  | 7.098521  |
| C  | 5.011163 | 3.527183  | 6.576361  |
| H  | 5.211107 | 3.230584  | 7.456135  |
| C  | 5.282593 | 2.739244  | 5.504617  |
| H  | 5.676818 | 1.888188  | 5.657097  |
| N  | 3.944225 | 1.406287  | 1.653140  |
| N  | 5.019228 | 3.106463  | 4.237612  |
| Zn | 5.665375 | 1.873596  | 2.696802  |
| Br | 7.135393 | 2.947455  | 1.196470  |
| Br | 6.714777 | -0.019656 | 3.667734  |
| Cl | 3.044867 | 0.221544  | 3.801236  |
| Cl | 4.060476 | 4.726146  | 2.425410  |
| C  | 7.023861 | 6.147377  | -0.376262 |
| H  | 6.323884 | 5.613580  | -0.017552 |
| C  | 8.092424 | 6.475667  | 0.436596  |
| H  | 8.122857 | 6.184603  | 1.340503  |



|    |          |           |           |
|----|----------|-----------|-----------|
| C  | 9.112481 | 7.234961  | -0.092146 |
| H  | 9.856707 | 7.476112  | 0.446469  |
| C  | 9.047944 | 7.641247  | -1.404127 |
| H  | 9.744155 | 8.159962  | -1.790262 |
| C  | 7.944535 | 7.275434  | -2.140197 |
| C  | 6.435845 | 3.665652  | -4.047835 |
| C  | 6.741328 | 2.804430  | -5.080088 |
| H  | 7.146900 | 1.962894  | -4.906766 |
| C  | 6.443885 | 3.191575  | -6.365742 |
| H  | 6.630578 | 2.615637  | -7.098521 |
| C  | 5.869752 | 4.431918  | -6.576361 |
| H  | 5.669807 | 4.728517  | -7.456135 |
| C  | 5.598321 | 5.219857  | -5.504617 |
| H  | 5.204096 | 6.070913  | -5.657097 |
| N  | 6.936689 | 6.552814  | -1.653140 |
| N  | 5.861686 | 4.852638  | -4.237612 |
| Zn | 5.215539 | 6.085505  | -2.696802 |
| Br | 3.745521 | 5.011647  | -1.196470 |
| Br | 4.166137 | 7.978757  | -3.667734 |
| Cl | 7.836047 | 7.737557  | -3.801236 |
| Cl | 6.820438 | 3.232955  | -2.425410 |
| C  | 6.518825 | -1.828140 | 10.593481 |
| H  | 5.818848 | -2.361937 | 10.952192 |
| C  | 7.587388 | -1.499850 | 11.406339 |
| H  | 7.617821 | -1.790914 | 12.310246 |
| C  | 8.607445 | -0.740556 | 10.877598 |

|    |          |           |           |
|----|----------|-----------|-----------|
| H  | 9.351670 | -0.499405 | 11.416212 |
| C  | 8.542908 | -0.334270 | 9.565616  |
| H  | 9.239119 | 0.184445  | 9.179481  |
| C  | 7.439499 | -0.700084 | 8.829547  |
| C  | 5.930809 | -4.309865 | 6.921908  |
| C  | 6.236291 | -5.171087 | 5.889655  |
| H  | 6.641864 | -6.012623 | 6.062977  |
| C  | 5.938849 | -4.783942 | 4.604001  |
| H  | 6.125541 | -5.359881 | 3.871222  |
| C  | 5.364715 | -3.543599 | 4.393382  |
| H  | 5.164771 | -3.247000 | 3.513609  |
| C  | 5.093285 | -2.755660 | 5.465126  |
| H  | 4.699060 | -1.904604 | 5.312647  |
| N  | 6.431653 | -1.422703 | 9.316603  |
| N  | 5.356650 | -3.122879 | 6.732132  |
| Zn | 4.710503 | -1.890012 | 8.272942  |
| Br | 3.240485 | -2.963870 | 9.773274  |
| Br | 3.661101 | 0.003240  | 7.302010  |
| Cl | 7.331011 | -0.237960 | 7.168508  |
| Cl | 6.315402 | -4.742562 | 8.544333  |
| 5  |          |           |           |
| C  | 5.249298 | 2.787050  | 5.493683  |
| H  | 5.669805 | 1.948454  | 5.641743  |
| C  | 4.945073 | 3.576799  | 6.574299  |
| H  | 5.144021 | 3.280903  | 7.454923  |
| C  | 4.349554 | 4.804119  | 6.370993  |

|    |          |           |           |
|----|----------|-----------|-----------|
| H  | 4.154689 | 5.369443  | 7.109082  |
| C  | 4.039018 | 5.202171  | 5.092595  |
| H  | 3.615767 | 6.035828  | 4.924647  |
| C  | 4.363642 | 4.343250  | 4.059491  |
| C  | 2.902684 | 0.751208  | 2.107090  |
| C  | 1.799474 | 0.409385  | 1.359057  |
| H  | 1.078967 | -0.076987 | 1.743570  |
| C  | 1.771696 | 0.791925  | 0.044197  |
| H  | 1.022693 | 0.578618  | -0.499426 |
| C  | 2.848458 | 1.494670  | -0.487272 |
| H  | 2.854210 | 1.754894  | -1.401044 |
| C  | 3.897768 | 1.801335  | 0.332582  |
| H  | 4.622117 | 2.302371  | -0.024308 |
| N  | 4.971298 | 3.161742  | 4.224125  |
| N  | 3.951315 | 1.422750  | 1.630868  |
| Zn | 5.640298 | 1.923384  | 2.704965  |
| Br | 3.926864 | 4.827488  | 2.286641  |
| Br | 2.971437 | 0.255045  | 3.933309  |
| Br | 7.146221 | 3.014103  | 1.242045  |
| Br | 6.716264 | 0.038637  | 3.678514  |
| C  | 5.042331 | -2.732811 | 5.555559  |
| H  | 4.621824 | -1.894215 | 5.407499  |
| C  | 5.346556 | -3.522560 | 4.474943  |
| H  | 5.147608 | -3.226664 | 3.594318  |
| C  | 5.942075 | -4.749880 | 4.678249  |
| H  | 6.136940 | -5.315204 | 3.940160  |

|    |          |           |           |
|----|----------|-----------|-----------|
| C  | 6.252611 | -5.147932 | 5.956646  |
| H  | 6.675862 | -5.981589 | 6.124595  |
| C  | 5.927987 | -4.289011 | 6.989750  |
| C  | 7.388945 | -0.696969 | 8.942151  |
| C  | 8.492155 | -0.355146 | 9.690185  |
| H  | 9.212662 | 0.131227  | 9.305671  |
| C  | 8.519933 | -0.737686 | 11.005045 |
| H  | 9.268936 | -0.524379 | 11.548667 |
| C  | 7.443171 | -1.440431 | 11.536513 |
| H  | 7.437419 | -1.700655 | 12.450285 |
| C  | 6.393861 | -1.747096 | 10.716659 |
| H  | 5.669512 | -2.248131 | 11.073550 |
| N  | 5.320331 | -3.107503 | 6.825117  |
| N  | 6.340314 | -1.368511 | 9.418374  |
| Zn | 4.651331 | -1.869145 | 8.344277  |
| Br | 6.364765 | -4.773249 | 8.762601  |
| Br | 7.320192 | -0.200806 | 7.115933  |
| Br | 3.145408 | -2.959864 | 9.807196  |
| Br | 3.575365 | 0.015602  | 7.370728  |
| C  | 5.571691 | 5.283366  | -5.493683 |
| H  | 5.151184 | 6.121963  | -5.641743 |
| C  | 5.875915 | 4.493617  | -6.574299 |
| H  | 5.676968 | 4.789514  | -7.454923 |
| C  | 6.471435 | 3.266298  | -6.370993 |
| H  | 6.666300 | 2.700974  | -7.109082 |
| C  | 6.781970 | 2.868246  | -5.092595 |

|    |          |          |           |
|----|----------|----------|-----------|
| H  | 7.205222 | 2.034589 | -4.924647 |
| C  | 6.457346 | 3.727167 | -4.059491 |
| C  | 7.918305 | 7.319209 | -2.107090 |
| C  | 9.021515 | 7.661031 | -1.359057 |
| H  | 9.742021 | 8.147404 | -1.743570 |
| C  | 9.049293 | 7.278492 | -0.044197 |
| H  | 9.798295 | 7.491798 | 0.499426  |
| C  | 7.972531 | 6.575746 | 0.487272  |
| H  | 7.966779 | 6.315522 | 1.401044  |
| C  | 6.923221 | 6.269081 | -0.332582 |
| H  | 6.198872 | 5.768046 | 0.024308  |
| N  | 5.849691 | 4.908675 | -4.224125 |
| N  | 6.869674 | 6.647667 | -1.630868 |
| Zn | 5.180691 | 6.147032 | -2.704965 |
| Br | 6.894125 | 3.242929 | -2.286641 |
| Br | 7.849552 | 7.815372 | -3.933309 |
| Br | 3.674767 | 5.056314 | -1.242045 |
| Br | 4.104724 | 8.031780 | -3.678514 |
| 6  |          |          |           |
| C  | 7.797884 | 5.492932 | 5.690246  |
| H  | 7.372512 | 6.332044 | 5.558751  |
| C  | 8.093858 | 4.715208 | 4.593331  |
| H  | 7.858172 | 5.008787 | 3.721194  |
| C  | 8.734183 | 3.512797 | 4.769782  |
| H  | 8.922375 | 2.956498 | 4.023520  |
| C  | 9.101232 | 3.118733 | 6.042023  |

|    |           |          |           |
|----|-----------|----------|-----------|
| H  | 9.589030  | 2.316054 | 6.184757  |
| C  | 8.736648  | 3.932004 | 7.102974  |
| C  | 10.169601 | 7.492761 | 9.154070  |
| C  | 11.249402 | 7.752773 | 9.920561  |
| H  | 12.011688 | 8.177739 | 9.544059  |
| C  | 11.243026 | 7.398520 | 11.259112 |
| H  | 11.982937 | 7.593720 | 11.821056 |
| C  | 10.140318 | 6.761800 | 11.743508 |
| H  | 10.108684 | 6.500550 | 12.656105 |
| C  | 9.081613  | 6.496760 | 10.927565 |
| H  | 8.325713  | 6.043627 | 11.282714 |
| N  | 9.079286  | 6.860994 | 9.628350  |
| N  | 8.098799  | 5.091432 | 6.972603  |
| Zn | 7.413679  | 6.325663 | 8.502552  |
| Br | 6.299316  | 8.221569 | 7.569837  |
| Br | 5.869596  | 5.183277 | 9.899657  |
| I  | 10.153523 | 8.056804 | 7.123091  |
| I  | 9.288502  | 3.349235 | 9.051571  |
| C  | 7.560933  | 2.811686 | 16.787519 |
| H  | 7.986304  | 1.972574 | 16.919013 |
| C  | 7.264959  | 3.589410 | 17.884433 |
| H  | 7.500644  | 3.295831 | 18.756571 |
| C  | 6.624634  | 4.791821 | 17.707983 |
| H  | 6.436441  | 5.348120 | 18.454245 |
| C  | 6.257584  | 5.185884 | 16.435741 |
| H  | 5.769786  | 5.988564 | 16.293008 |

|    |          |           |           |
|----|----------|-----------|-----------|
| C  | 6.622168 | 4.372614  | 15.374791 |
| C  | 5.189215 | 0.811857  | 13.323695 |
| C  | 4.109415 | 0.551845  | 12.557203 |
| H  | 3.347129 | 0.126879  | 12.933706 |
| C  | 4.115790 | 0.906097  | 11.218652 |
| H  | 3.375879 | 0.710897  | 10.656708 |
| C  | 5.218498 | 1.542818  | 10.734256 |
| H  | 5.250132 | 1.804068  | 9.821659  |
| C  | 6.277204 | 1.807857  | 11.550199 |
| H  | 7.033104 | 2.260991  | 11.195051 |
| N  | 6.279530 | 1.443624  | 12.849414 |
| N  | 7.260018 | 3.213186  | 15.505162 |
| Zn | 7.945137 | 1.978955  | 13.975213 |
| Br | 9.059500 | 0.083049  | 14.907928 |
| Br | 9.489220 | 3.121341  | 12.578108 |
| I  | 5.205293 | 0.247813  | 15.354673 |
| I  | 6.070314 | 4.955382  | 13.426194 |
| C  | 7.985016 | 11.074675 | 5.548636  |
| H  | 8.410388 | 10.235563 | 5.680131  |
| C  | 7.689042 | 11.852399 | 6.645551  |
| H  | 7.924728 | 11.558819 | 7.517688  |
| C  | 7.048717 | 13.054810 | 6.469101  |
| H  | 6.860524 | 13.611109 | 7.215362  |
| C  | 6.681668 | 13.448873 | 5.196859  |
| H  | 6.193869 | 14.251553 | 5.054125  |
| C  | 7.046252 | 12.635603 | 4.135909  |

|    |          |           |           |
|----|----------|-----------|-----------|
| C  | 5.613299 | 9.074846  | 2.084813  |
| C  | 4.533498 | 8.814834  | 1.318321  |
| H  | 3.771212 | 8.389868  | 1.694823  |
| C  | 4.539874 | 9.169086  | -0.020230 |
| H  | 3.799962 | 8.973886  | -0.582174 |
| C  | 5.642581 | 9.805807  | -0.504626 |
| H  | 5.674215 | 10.067057 | -1.417223 |
| C  | 6.701287 | 10.070846 | 0.311317  |
| H  | 7.457187 | 10.523980 | -0.043832 |
| N  | 6.703614 | 9.706613  | 1.610532  |
| N  | 7.684101 | 11.476175 | 4.266280  |
| Zn | 8.369220 | 10.241943 | 2.736331  |
| Br | 9.483583 | 8.346038  | 3.669046  |
| Br | 9.913303 | 11.384330 | 1.339225  |
| I  | 5.629376 | 8.510802  | 4.115791  |
| I  | 6.494398 | 13.218371 | 2.187311  |
| 7  |          |           |           |
| C  | 8.705490 | 3.755197  | 7.245338  |
| C  | 9.037169 | 2.889639  | 6.225801  |
| H  | 9.442569 | 2.049775  | 6.405249  |
| C  | 8.760255 | 3.287223  | 4.935379  |
| H  | 8.954320 | 2.711963  | 4.205016  |
| C  | 8.202177 | 4.520621  | 4.714784  |
| H  | 8.038470 | 4.823957  | 3.828976  |
| C  | 7.882810 | 5.312279  | 5.793756  |
| H  | 7.473633 | 6.154379  | 5.633739  |



|    |           |           |           |
|----|-----------|-----------|-----------|
| C  | 10.108468 | 7.511188  | 9.213546  |
| C  | 11.123923 | 8.019302  | 9.995343  |
| H  | 11.769769 | 8.614792  | 9.635305  |
| C  | 11.168798 | 7.631204  | 11.322340 |
| H  | 11.852507 | 7.961804  | 11.893829 |
| C  | 10.215348 | 6.762320  | 11.811535 |
| H  | 10.240752 | 6.474529  | 12.715631 |
| C  | 9.230156  | 6.321536  | 10.964588 |
| H  | 8.569662  | 5.727163  | 11.302910 |
| N  | 8.125882  | 4.943895  | 7.075034  |
| N  | 9.158718  | 6.699346  | 9.661593  |
| Cl | 9.099169  | 3.330256  | 8.876825  |
| Cl | 10.039235 | 7.922156  | 7.532911  |
| Zn | 7.451576  | 6.164871  | 8.605024  |
| I  | 5.803666  | 4.999849  | 10.189763 |
| I  | 6.286989  | 8.225650  | 7.577944  |
| C  | 6.936491  | 12.710628 | 4.184443  |
| C  | 6.604812  | 13.576185 | 5.203979  |
| H  | 6.199412  | 14.416050 | 5.024531  |
| C  | 6.881726  | 13.178601 | 6.494401  |
| H  | 6.687661  | 13.753862 | 7.224764  |
| C  | 7.439804  | 11.945203 | 6.714996  |
| H  | 7.603511  | 11.641867 | 7.600804  |
| C  | 7.759171  | 11.153545 | 5.636025  |
| H  | 8.168348  | 10.311445 | 5.796042  |
| C  | 5.533513  | 8.954636  | 2.216234  |

|    |          |           |           |
|----|----------|-----------|-----------|
| C  | 4.518058 | 8.446523  | 1.434437  |
| H  | 3.872212 | 7.851032  | 1.794476  |
| C  | 4.473183 | 8.834620  | 0.107440  |
| H  | 3.789473 | 8.504020  | -0.464049 |
| C  | 5.426633 | 9.703504  | -0.381755 |
| H  | 5.401228 | 9.991295  | -1.285850 |
| C  | 6.411825 | 10.144289 | 0.465192  |
| H  | 7.072319 | 10.738661 | 0.126871  |
| N  | 7.516099 | 11.521929 | 4.354746  |
| N  | 6.483263 | 9.766478  | 1.768187  |
| Cl | 6.542811 | 13.135569 | 2.552956  |
| Cl | 5.602746 | 8.543668  | 3.896869  |
| Zn | 8.190405 | 10.300953 | 2.824756  |
| I  | 9.838315 | 11.465975 | 1.240017  |
| I  | 9.354992 | 8.240174  | 3.851836  |
| C  | 6.722373 | 4.251091  | 15.614223 |
| C  | 6.390694 | 5.116649  | 16.633759 |
| H  | 5.985294 | 5.956513  | 16.454312 |
| C  | 6.667608 | 4.719064  | 17.924182 |
| H  | 6.473543 | 5.294325  | 18.654545 |
| C  | 7.225686 | 3.485667  | 18.144776 |
| H  | 7.389393 | 3.182331  | 19.030584 |
| C  | 7.545053 | 2.694009  | 17.065805 |
| H  | 7.954230 | 1.851909  | 17.225822 |
| C  | 5.319395 | 0.495099  | 13.646015 |
| C  | 4.303940 | -0.013014 | 12.864218 |

|    |          |           |           |
|----|----------|-----------|-----------|
| H  | 3.658094 | -0.608504 | 13.224256 |
| C  | 4.259065 | 0.375084  | 11.537220 |
| H  | 3.575356 | 0.044484  | 10.965731 |
| C  | 5.212515 | 1.243968  | 11.048026 |
| H  | 5.187111 | 1.531759  | 10.143930 |
| C  | 6.197707 | 1.684752  | 11.894972 |
| H  | 6.858201 | 2.279124  | 11.556651 |
| N  | 7.301981 | 3.062393  | 15.784527 |
| N  | 6.269145 | 1.306942  | 13.197967 |
| Cl | 6.328694 | 4.676032  | 13.982736 |
| Cl | 5.388628 | 0.084132  | 15.326650 |
| Zn | 7.976287 | 1.841417  | 14.254536 |
| I  | 9.624197 | 3.006438  | 12.669797 |
| I  | 9.140874 | -0.219363 | 15.281616 |
| 9  |          |           |           |
| C  | 3.496774 | 9.503204  | 4.837996  |
| C  | 2.767366 | 8.753988  | 5.727893  |
| H  | 2.108012 | 8.135203  | 5.437993  |
| C  | 3.044812 | 8.952667  | 7.076401  |
| H  | 2.580379 | 8.461279  | 7.744121  |
| C  | 4.667520 | 10.610343 | 6.425315  |
| H  | 5.328846 | 11.244295 | 6.677195  |
| C  | 6.026201 | 10.692242 | 1.108509  |
| H  | 5.306040 | 11.268561 | 0.880392  |
| C  | 6.686753 | 10.021891 | 0.093861  |
| H  | 6.435124 | 10.156871 | -0.812669 |

|    |           |           |           |
|----|-----------|-----------|-----------|
| C  | 7.710687  | 9.158929  | 0.411087  |
| H  | 8.163268  | 8.672090  | -0.267325 |
| C  | 8.069638  | 9.014849  | 1.742962  |
| H  | 8.786918  | 8.444596  | 1.992466  |
| C  | 7.367797  | 9.714015  | 2.699393  |
| C  | 4.008594  | 9.877811  | 7.425707  |
| H  | 4.225291  | 10.017341 | 8.339366  |
| N  | 4.384102  | 10.435931 | 5.106510  |
| N  | 6.365240  | 10.558778 | 2.414246  |
| Zn | 5.340444  | 11.722943 | 3.786398  |
| I  | 3.075847  | 9.175915  | 2.749769  |
| I  | 7.844200  | 9.430102  | 4.734631  |
| I  | 6.930768  | 13.349984 | 5.013837  |
| I  | 3.627290  | 13.198018 | 2.519750  |
| C  | -0.626067 | 13.246246 | -1.102569 |
| C  | -1.355475 | 13.995462 | -0.212672 |
| H  | -2.014830 | 14.614247 | -0.502572 |
| C  | -1.078029 | 13.796783 | 1.135836  |
| H  | -1.542463 | 14.288171 | 1.803556  |
| C  | 0.544678  | 12.139107 | 0.484750  |
| H  | 1.206005  | 11.505155 | 0.736630  |
| C  | 1.903360  | 12.057209 | -4.832056 |
| H  | 1.183199  | 11.480889 | -5.060174 |
| C  | 2.563912  | 12.727559 | -5.846704 |
| H  | 2.312283  | 12.592579 | -6.753235 |
| C  | 3.587846  | 13.590521 | -5.529478 |

|    |           |           |           |
|----|-----------|-----------|-----------|
| H  | 4.040427  | 14.077360 | -6.207891 |
| C  | 3.946797  | 13.734601 | -4.197603 |
| H  | 4.664077  | 14.304854 | -3.948100 |
| C  | 3.244956  | 13.035435 | -3.241172 |
| C  | -0.114247 | 12.871639 | 1.485141  |
| H  | 0.102450  | 12.732109 | 2.398800  |
| N  | 0.261261  | 12.313519 | -0.834055 |
| N  | 2.242399  | 12.190672 | -3.526320 |
| Zn | 1.217603  | 11.026507 | -2.154168 |
| I  | -1.046994 | 13.573535 | -3.190796 |
| I  | 3.721359  | 13.319348 | -1.205935 |
| I  | 2.807927  | 9.399466  | -0.926728 |
| I  | -0.495551 | 9.551432  | -3.420815 |
| C  | 7.619615  | 13.246246 | 10.778562 |
| C  | 6.890207  | 13.995462 | 11.668458 |
| H  | 6.230853  | 14.614247 | 11.378559 |
| C  | 7.167653  | 13.796783 | 13.016967 |
| H  | 6.703220  | 14.288171 | 13.684686 |
| C  | 8.790361  | 12.139107 | 12.365881 |
| H  | 9.451687  | 11.505155 | 12.617761 |
| C  | 10.149042 | 12.057209 | 7.049075  |
| H  | 9.428881  | 11.480889 | 6.820957  |
| C  | 10.809594 | 12.727559 | 6.034426  |
| H  | 10.557965 | 12.592579 | 5.127896  |
| C  | 11.833528 | 13.590521 | 6.351652  |
| H  | 12.286109 | 14.077360 | 5.673240  |

|    |           |           |           |
|----|-----------|-----------|-----------|
| C  | 12.192479 | 13.734601 | 7.683527  |
| H  | 12.909759 | 14.304854 | 7.933031  |
| C  | 11.490638 | 13.035435 | 8.639958  |
| C  | 8.131435  | 12.871639 | 13.366272 |
| H  | 8.348132  | 12.732109 | 14.279931 |
| N  | 8.506943  | 12.313519 | 11.047075 |
| N  | 10.488081 | 12.190672 | 8.354811  |
| Zn | 9.463285  | 11.026507 | 9.726963  |
| I  | 7.198688  | 13.573535 | 8.690334  |
| I  | 11.967041 | 13.319348 | 10.675196 |
| I  | 11.053609 | 9.399466  | 10.954402 |
| I  | 7.750131  | 9.551432  | 8.460315  |

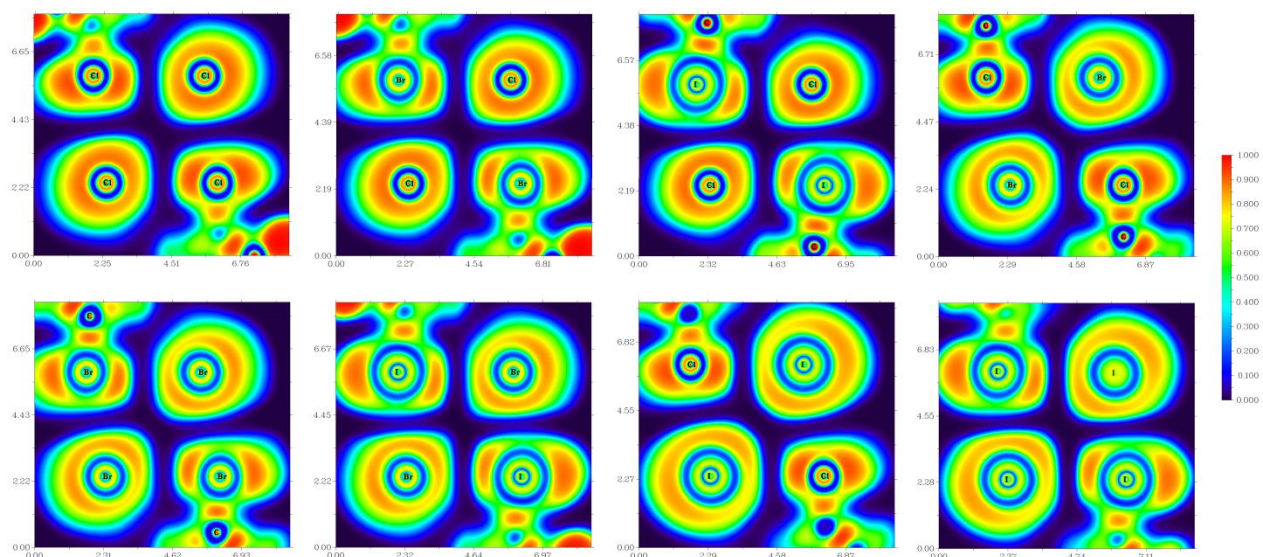

**Figure S23.** Visualization of electron localization function (ELF) in the areas of intermolecular non-covalent interactions  $X \cdots Y$  ( $X, Y = \text{Cl, Br, I}$ ) in **1–7** and **9** (from left to right, from top to bottom). Length units – Å, the color scale for the ELF maps presented in a.u.
